# Supplementary material
Source: PubMed Central journal article supplement (PMC5578890)

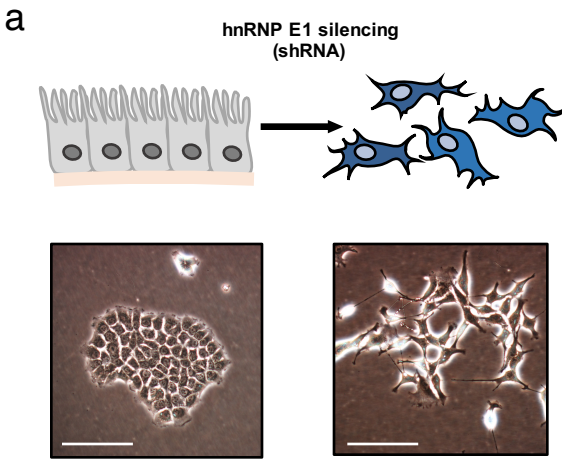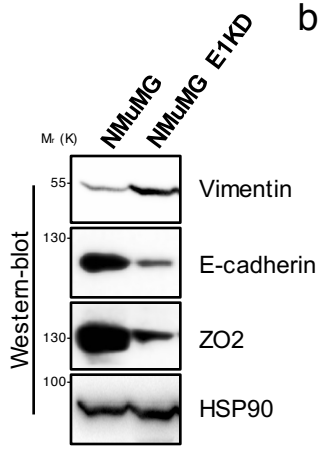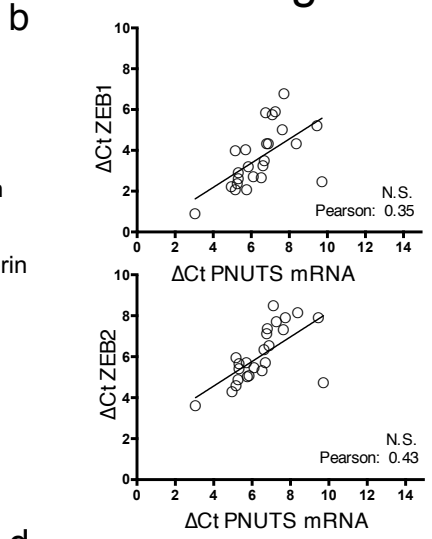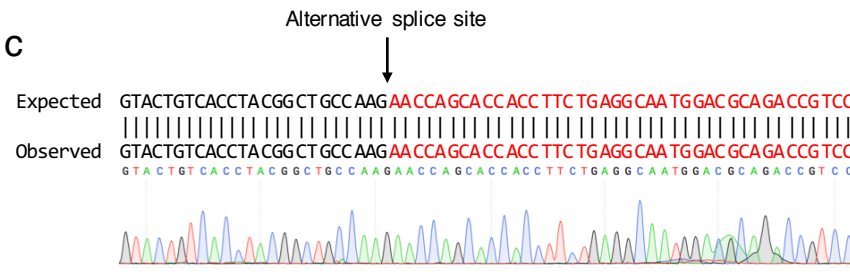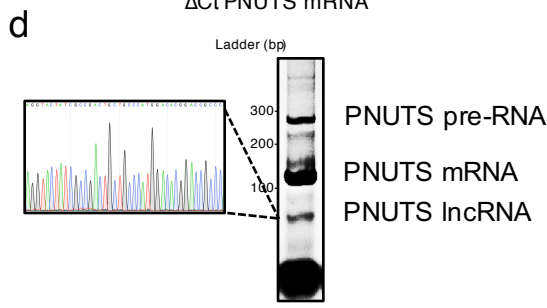

**e**

CLUSTAL multiple sequence alignment by MUSCLE (3.8)

Mouse PNUTS mRNA AGGTACTATCGCGACTGCTGCCAAGCCAGCCCTTTGAGGGAAACAAAGCACGAGCAGACACAGCCAAAOCCTCTCCACGAGCCTGCACCACCTGCTGAGCCATGACACGGAACCGCC

Mouse PNUTS ncRNA AGGTACTATCGCGACTGCT-----GCACAATGACACGGAACCGCC

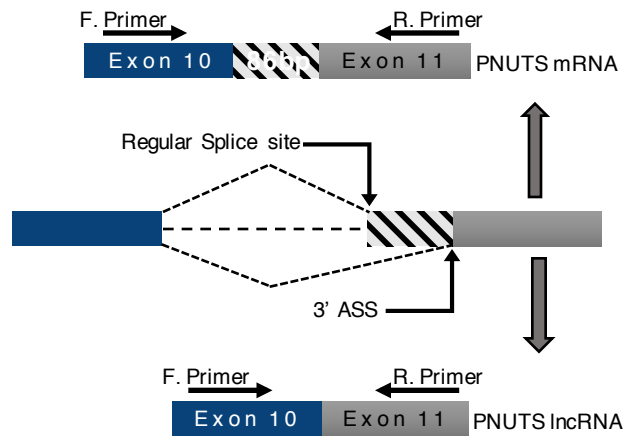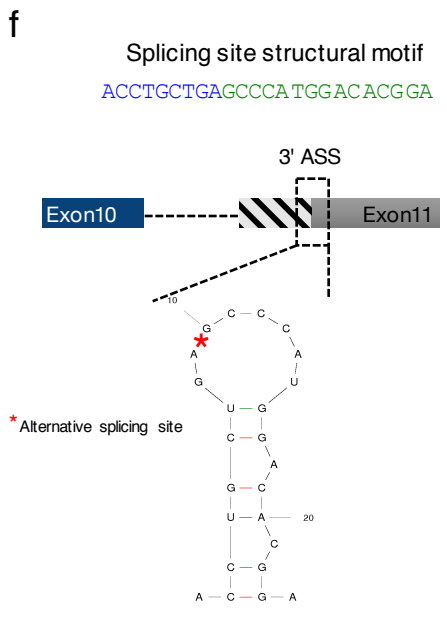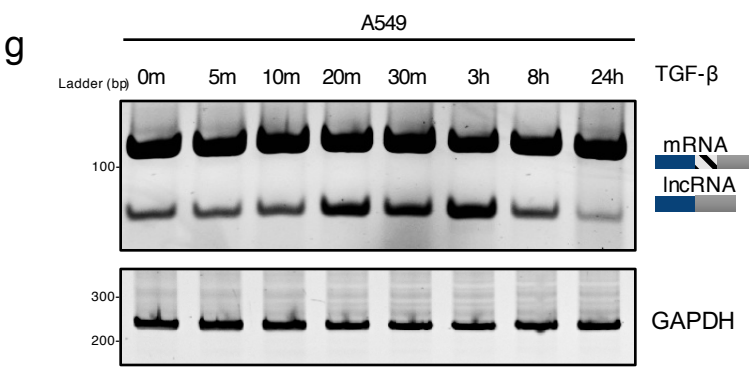

Supplement: NIHMS894389-supplement-2.pdf [file NIHMS894389-supplement-2.pdf]
