# Supplementary material
Source: PubMed Central journal article supplement (PMC5578890)

a

| Position  | Splice site type | Motif                 | New potential splice site | Consensus value |
|-----------|------------------|-----------------------|---------------------------|-----------------|
| -12       | <b>Acceptor</b>  | <b>ctttcacaatagCC</b> | <b>ctttcacaatagCC</b>     | 79.38           |
| -7        | Acceptor         | acaatagCCAAGCC        | acaatagccaagCC            | 66.43           |
| 5         | Acceptor         | GCCCCTTTGAAGGG        | gcccctttgaagGG            | 81.41           |
| 20        | Acceptor         | AAACGAGCACAGAA        | aaacgagcacagAA            | 74.41           |
| 27        | Acceptor         | CACAGAACCAAGCA        | cacagaaccaagCA            | 67.16           |
| 32        | Acceptor         | AACCAAGCACAGCC        | aaccaagcacagCC            | 75.73           |
| <b>50</b> | <b>Acceptor</b>  | <b>CTTCTCCCCAGAA</b>  | <b>cttctcccagAA</b>       | 91.74           |
| 56        | Acceptor         | CCCCAGAACCAGCA        | cccagaaccagCA             | 77.88           |
| 70        | Acceptor         | CCACCTTCTGAGGC        | ccaccttctgagGC            | 78.75           |
| 83        | Acceptor         | CAATGGACGCAGAC        | caatggacgcagAC            | 77.57           |
| 92        | Acceptor         | CAGACCGTCCAGGC        | cagaccgtccagGC            | 84.2            |
| 109       | Donor            | CCGGTCCC              | CCGgttccc                 | 67.23           |
| 116       | Acceptor         | CCCCTGTTGAAGTC        | cccctgttgaagTC            | 75.97           |
| 124       | Acceptor         | GAAGTCCCGGAGCT        | gaagtcccgagCT             | 70.04           |
| 137       | Acceptor         | TCATGGATACAGgt        | tcatggatacagGT            | 85.83           |
| 146       | Acceptor         | CAGgtaatctagaa        | caggtaatctagAA            | 70.47           |
| 146       | Donor            | CAGgtaatc             | CAGgtaatc                 | 85.51 (WT)      |

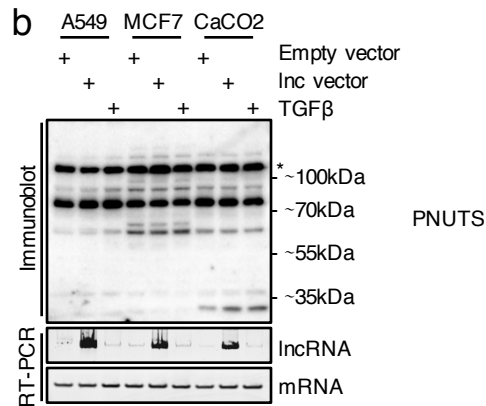

c

Single Color:

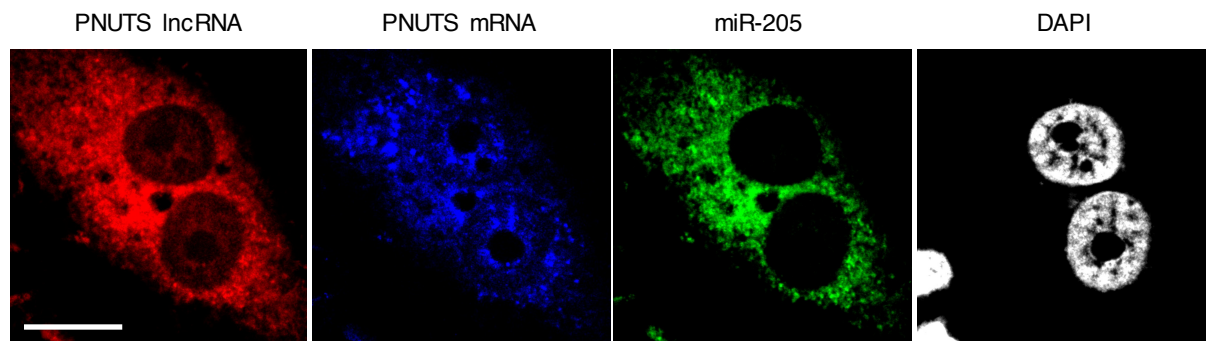

Merge:

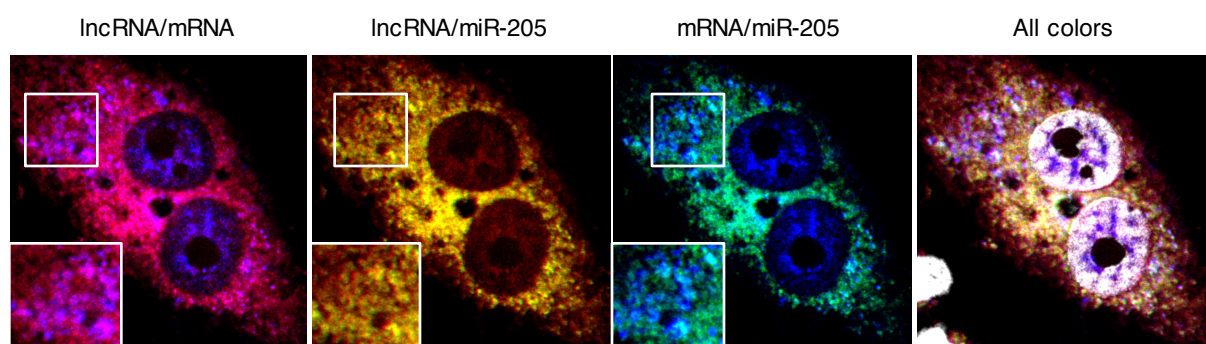

Supplement: NIHMS894389-supplement-3.pdf [file NIHMS894389-supplement-3.pdf]
