# Supplementary material
Source: PubMed Central journal article supplement (PMC5578890)

a

Splice-Specific PCR

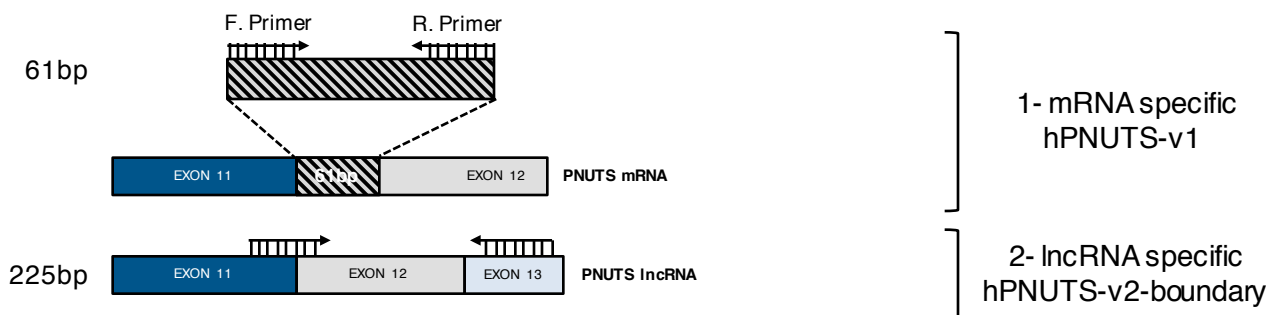

b

Competitive, end-point PCR

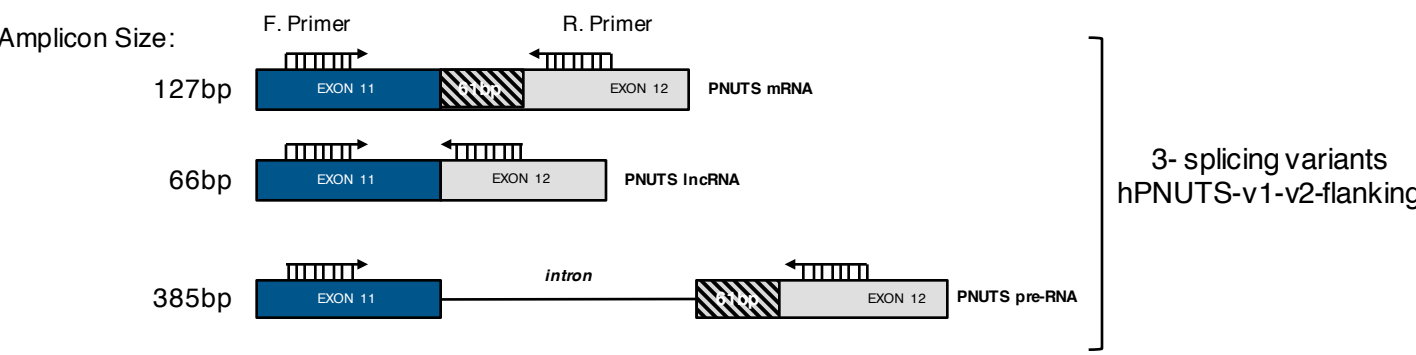

c

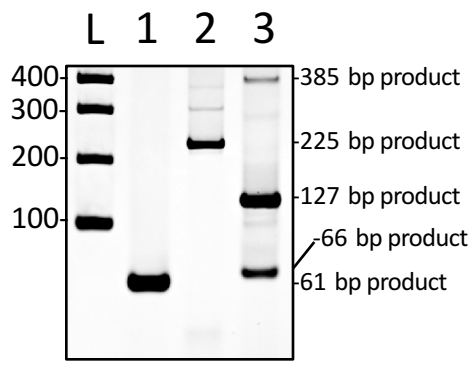

L - Ladder  
 1- mRNA specific hPNUTS-v1  
 2- lncRNA specific hPNUTS-v2-boundary  
 3- splicing variants hPNUTS-v1-v2-flanking

d

Northern blot

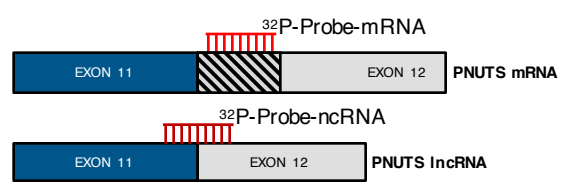

e

SiRNA/shRNA design

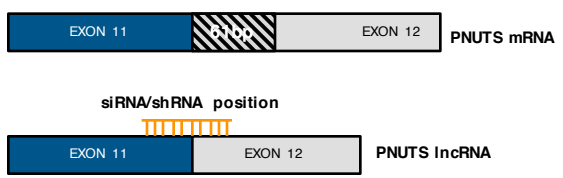

Supplement: NIHMS894389-supplement-7.pdf [file NIHMS894389-supplement-7.pdf]
