# Supplementary material
Source: PubMed Central journal article supplement (PMC5578890)

a

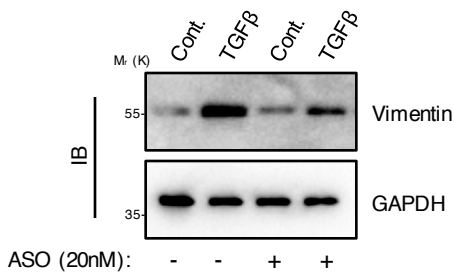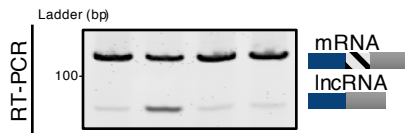

b

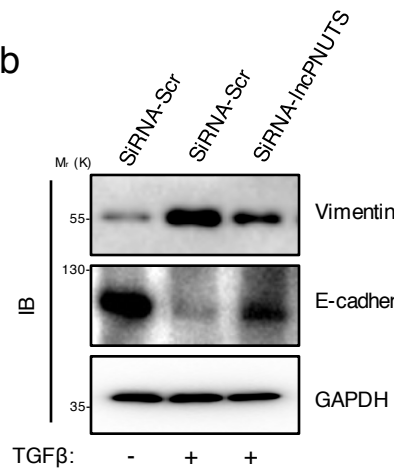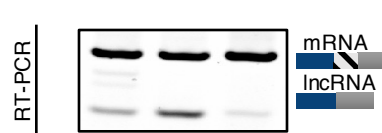

c

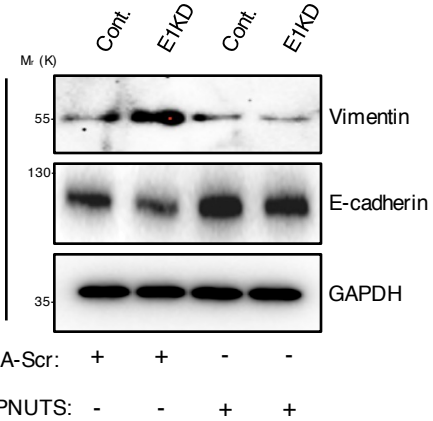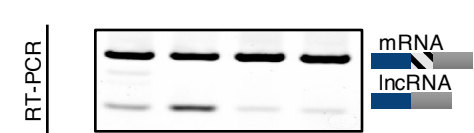

d

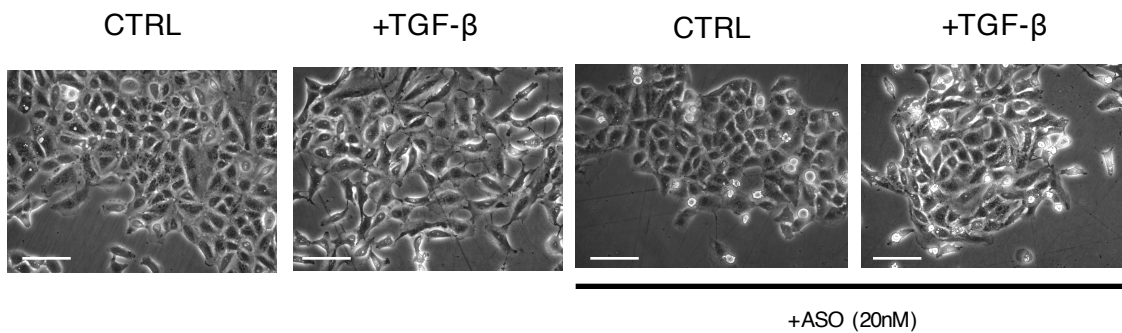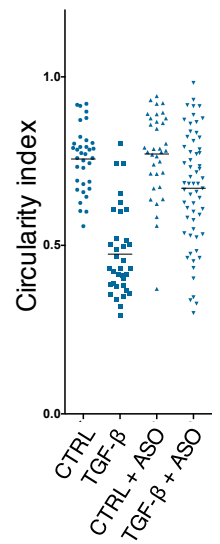

e

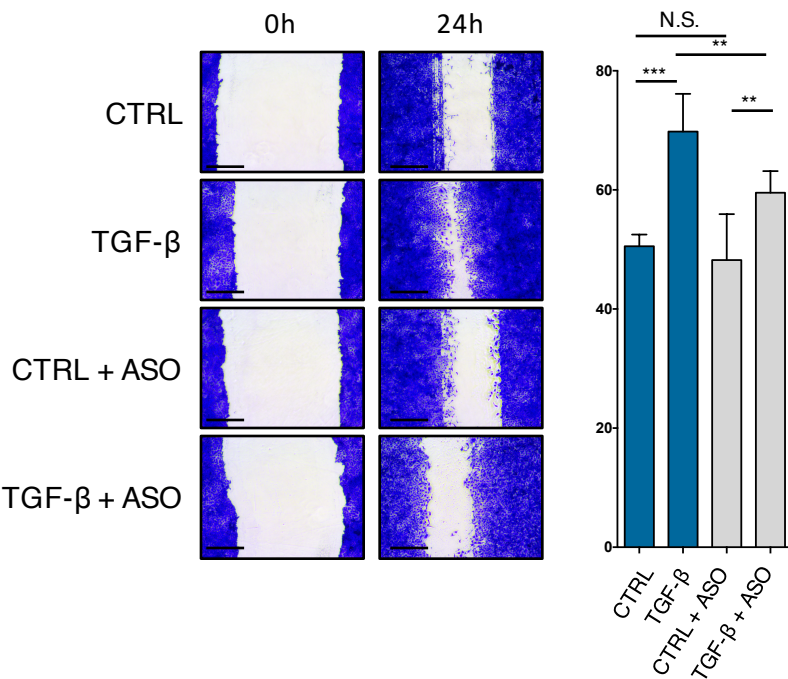

Supplement: NIHMS894389-supplement-4.pdf [file NIHMS894389-supplement-4.pdf]

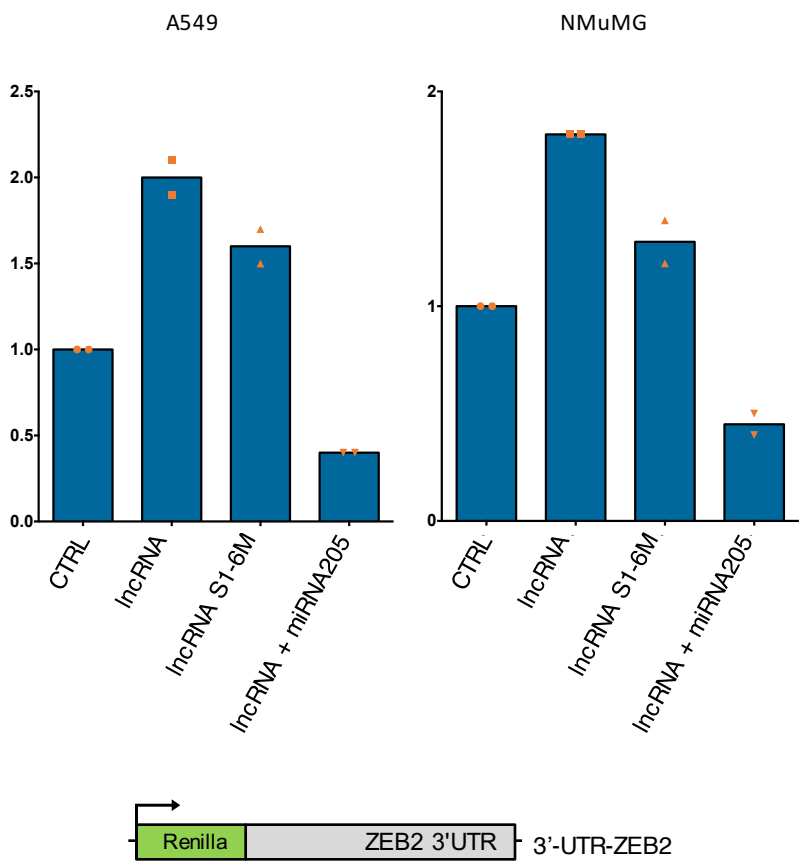

Supplement: NIHMS894389-supplement-5.pdf [file NIHMS894389-supplement-5.pdf]

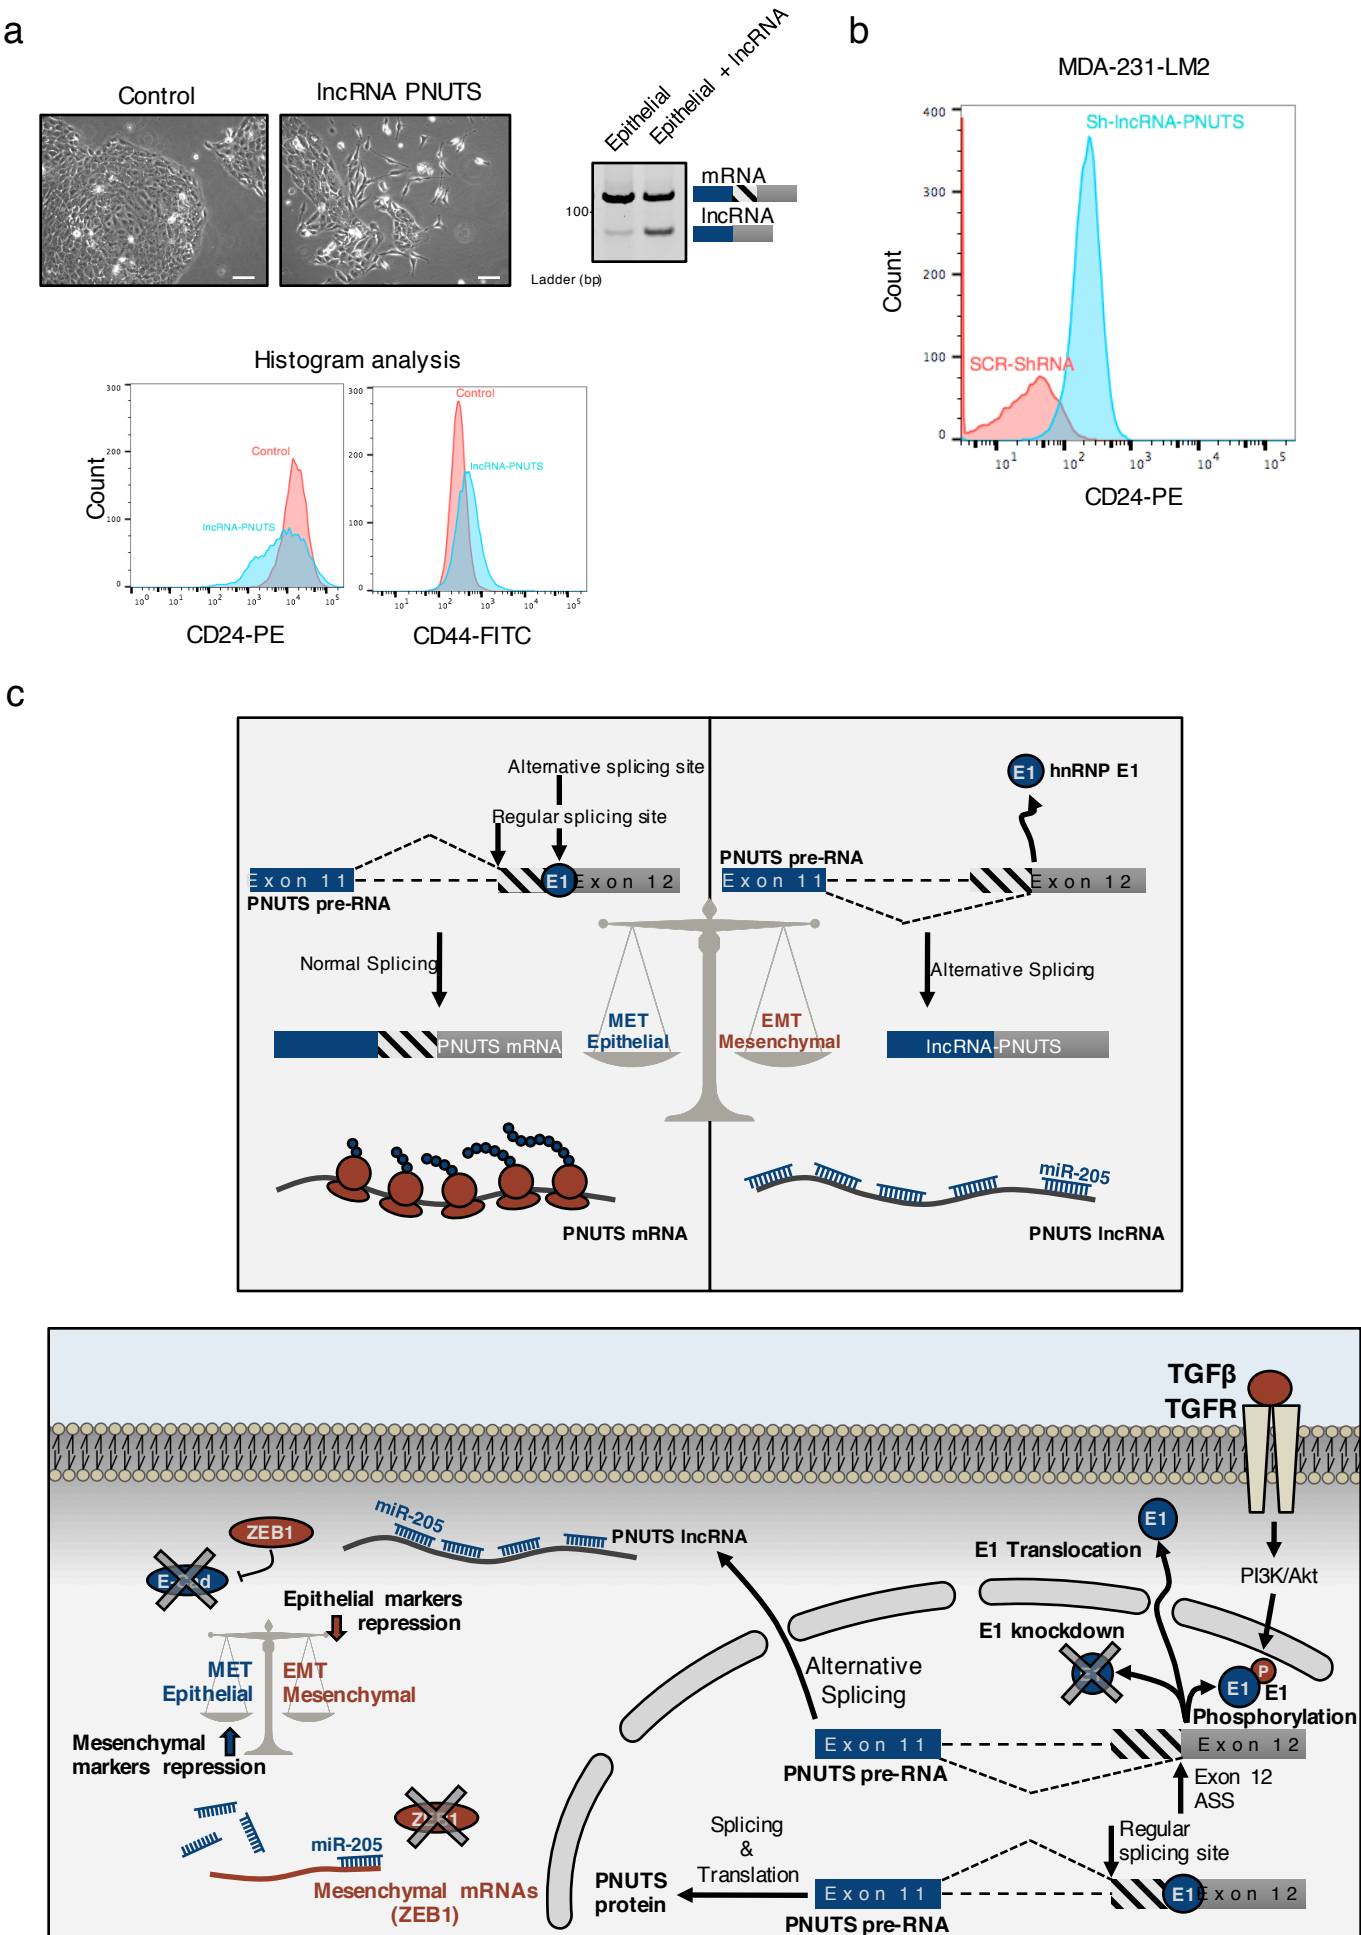

Supplement: NIHMS894389-supplement-6.pdf [file NIHMS894389-supplement-6.pdf]

Figure 2e

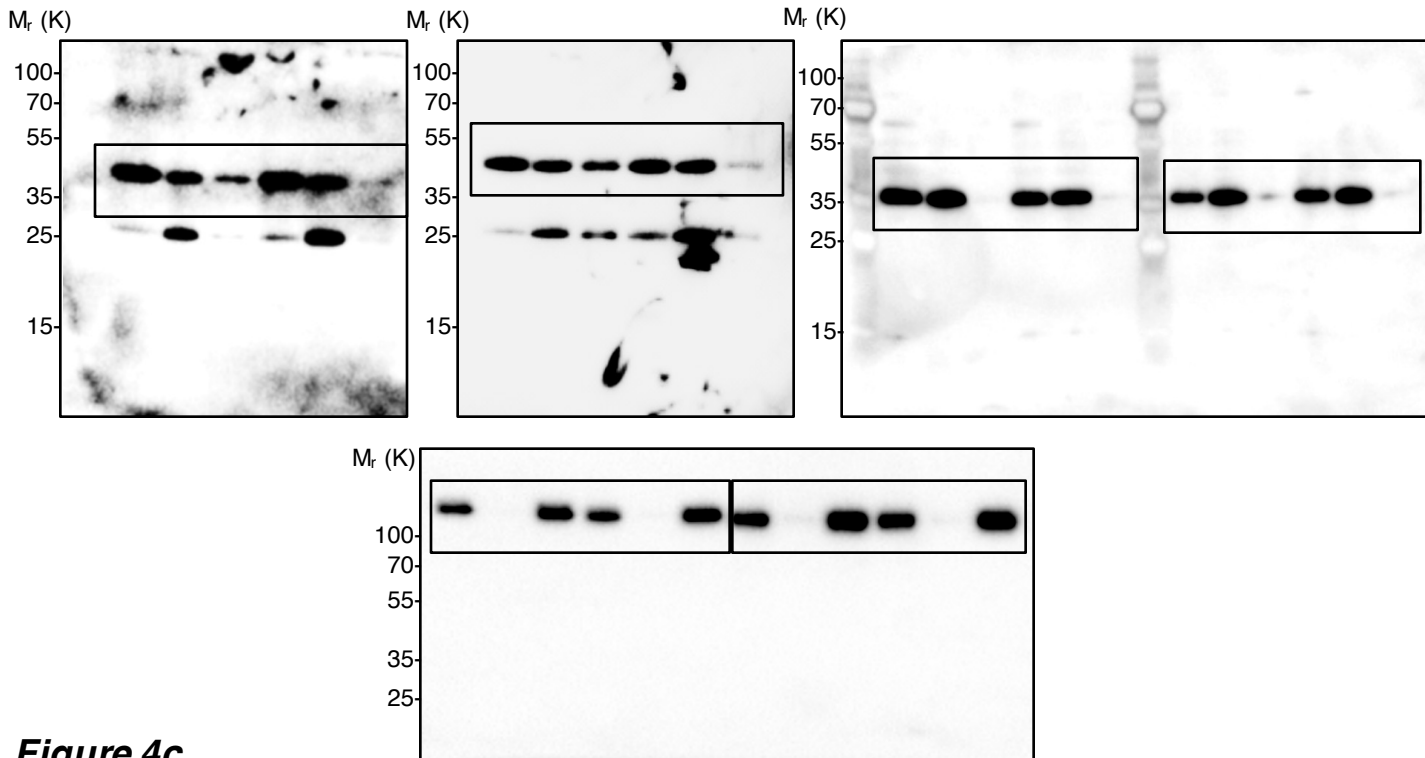

Figure 4c

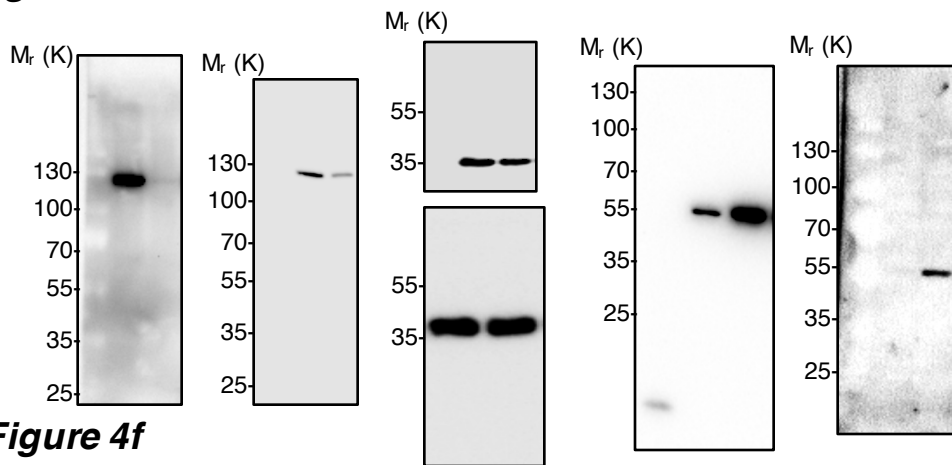

Figure 4f

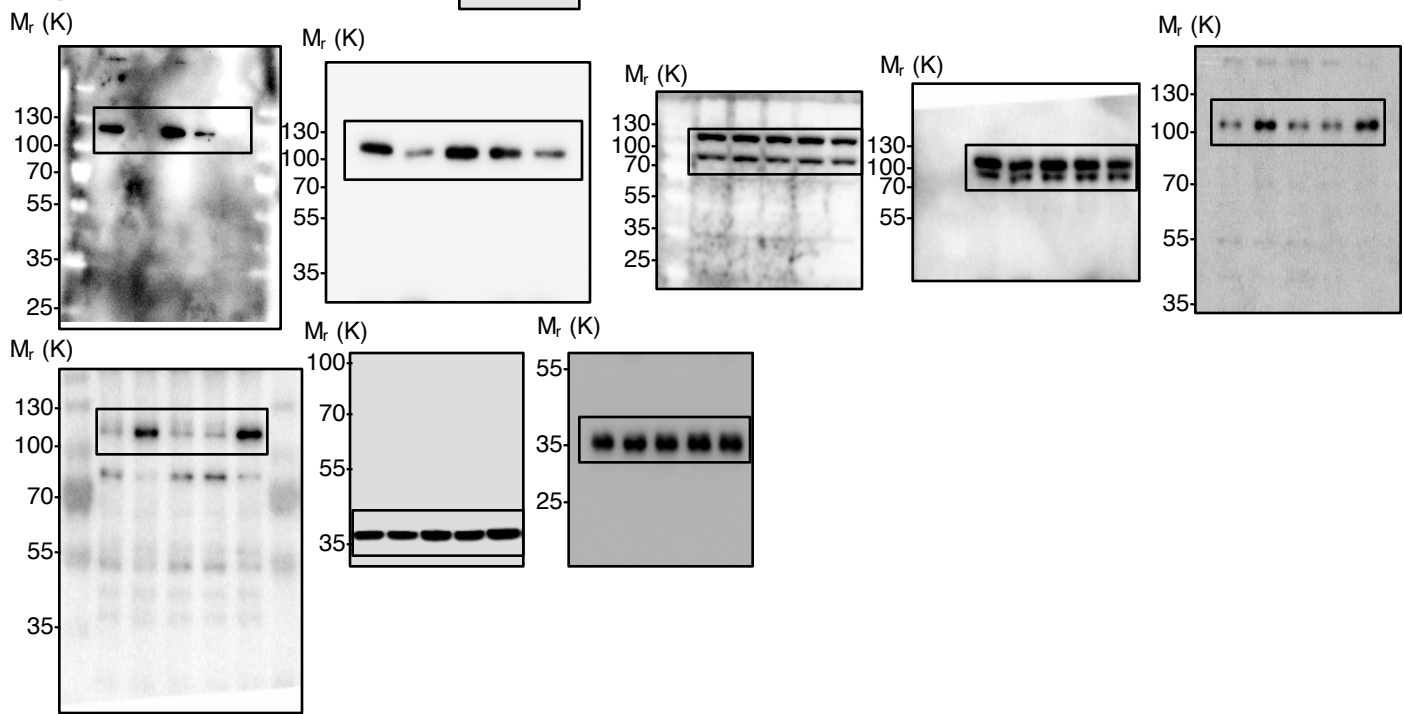

**Figure S3 a**

**Figure S3 b**

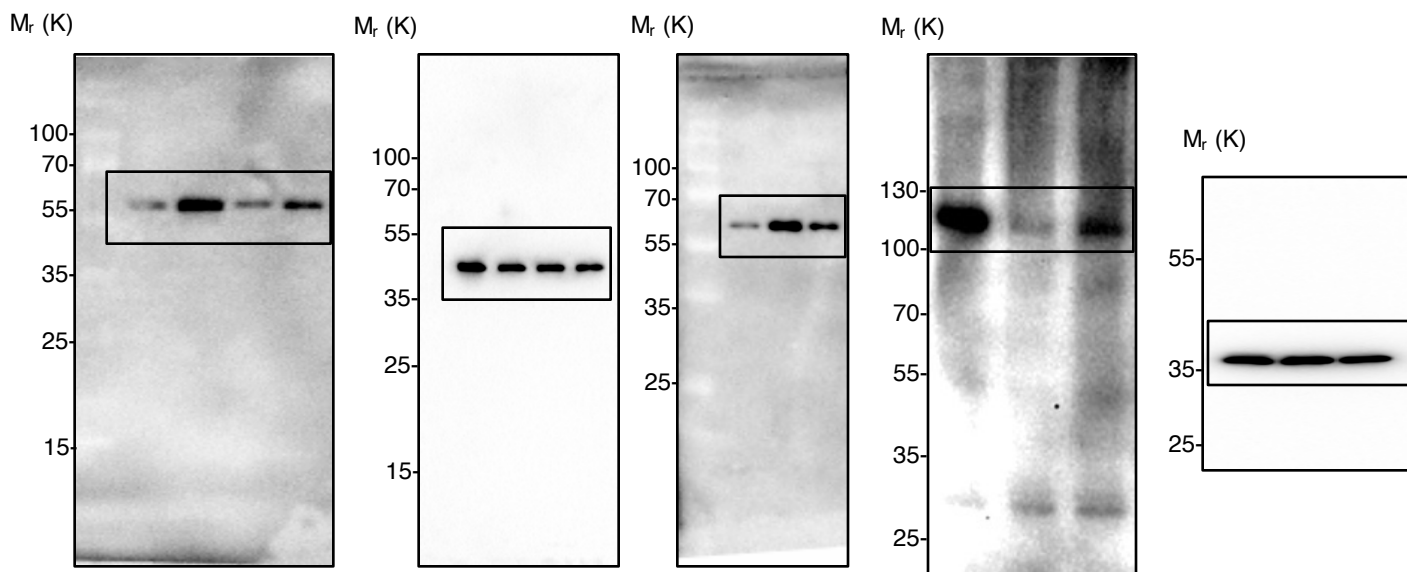

**Figure S3 c**

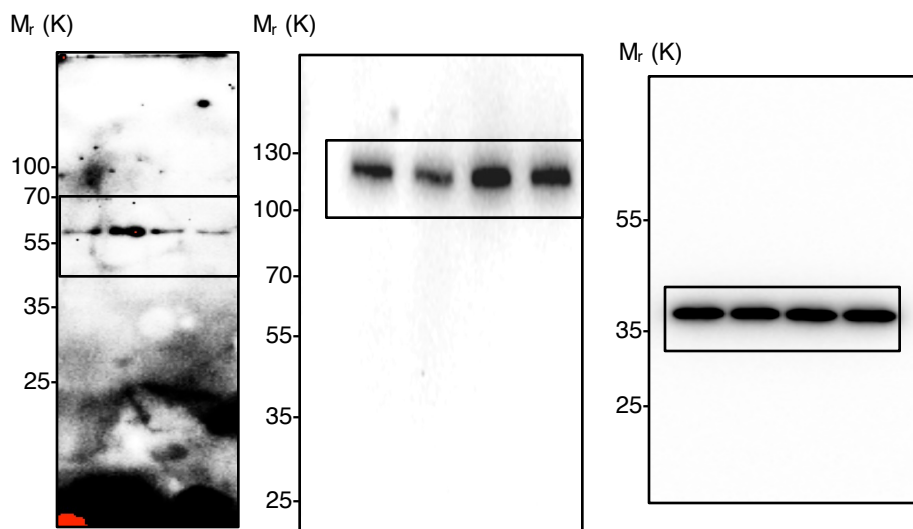

Supplement: NIHMS894389-supplement-8.pdf [file NIHMS894389-supplement-8.pdf]
